# Supplementary material
Source: PubMed Central journal article supplement (PMC2870934)
Supplement: supp_me.2009-0531_ME_09_0531_Supp_Data.pdf [file supp_me.2009-0531_ME_09_0531_Supp_Data.pdf]

1 Supplemental Table 1: Genes increased upon ICI treatment

2

| Accession | Gene Symbol   | Gene Title                                                                                                  | fold change |
|-----------|---------------|-------------------------------------------------------------------------------------------------------------|-------------|
| M60510    | Smarcd2       | SWI/SNF related, matrix associated, actin dependent regulator of chromatin, subfamily d, member 2 (Smarcd2) | 15.16       |
| AV339477  | Rmi1          | RMI1, RecQ mediated genome instability 1, homolog                                                           | 3.18        |
| NM_011619 | Tnnt2         | troponin T2, cardiac                                                                                        | 2.81        |
| BB524685  | Tmprss11a     | transmembrane protease, serine 11a                                                                          | 2.64        |
| AK010391  | Esco2         | establishment of cohesion 1 homolog 2                                                                       | 2.5         |
| BC025084  | Cenph         | centromere protein H                                                                                        | 2.43        |
| NM_019976 | Psrc1         | proline/serine-rich coiled-coil 1                                                                           | 2.19        |
| NM_026024 | Ube2t         | ubiquitin-conjugating enzyme E2T                                                                            | 2.04        |
| AW553424  | Kctd14        | potassium channel tetramerisation domain containing 14                                                      | 2.01        |
| AK011162  | Dscc1         | defective in sister chromatid cohesion 1 homolog                                                            | 1.97        |
| AK014919  | Cenpp         | centromere protein P                                                                                        | 1.94        |
| AU018569  | C330027C09Rik | RIKEN cDNA C330027C09 gene                                                                                  | 1.93        |
| BG069355  | E2f7          | E2F transcription factor 7                                                                                  | 1.9         |
| NM_010790 | Melk          | maternal embryonic leucine zipper kinase                                                                    | 1.9         |
| AV333851  | Snx22         | sorting nexin 22                                                                                            | 1.9         |
| AF091432  | Ccne2         | cyclin E2                                                                                                   | 1.88        |
| BC003738  | Rad51ap1      | RAD51 associated protein 1                                                                                  | 1.87        |
| AV270035  | Dtl           | denticleless homolog                                                                                        | 1.86        |
| AK003674  | Cthrc1        | collagen triple helix repeat containing 1                                                                   | 1.85        |
| U31625    | Brca1         | breast cancer 1                                                                                             | 1.83        |
| BB702754  | Uhrf1         | ubiquitin-like, containing PHD and RING finger domains, 1                                                   | 1.82        |
| BE848253  | Cenpf         | centromere protein F                                                                                        | 1.79        |
| NM_023209 | Pbk           | PDZ binding kinase                                                                                          | 1.79        |
| NM_009004 | Kif20a        | kinesin family member 20A                                                                                   | 1.78        |
| BB543028  | E2f2          | E2F transcription factor 2                                                                                  | 1.77        |
| NM_025581 | 2810433K01Rik | RIKEN cDNA 2810433K01 gene                                                                                  | 1.77        |
| BC004617  | Tcf19         | transcription factor 19                                                                                     | 1.77        |
| NM_011369 | Shcbp1        | Shc SH2-domain binding protein 1                                                                            | 1.76        |
| AK010351  | Nuf2          | NUF2, NDC80 kinetochore complex component, homolog                                                          | 1.72        |

|           |               |                                                       |      |
|-----------|---------------|-------------------------------------------------------|------|
| AK011345  | 6720460F02Rik | RIKEN cDNA 6720460F02 gene                            | 1.72 |
| BE629588  | Zfp367        | zinc finger protein 367                               | 1.71 |
| BC005799  | Depdc1a       | DEP domain containing 1a                              | 1.68 |
| NM_008087 | Gas2          | growth arrest specific 2                              | 1.68 |
| NM_009445 | Ttk           | Ttk protein kinase                                    | 1.68 |
| NM_021790 | Cenpk         | centromere protein K                                  | 1.67 |
| BC027121  | Spc25         | SPC25, NDC80 kinetochore complex component, homolog   | 1.67 |
| BF577722  | Spc24         | SPC24, NDC80 kinetochore complex component, homolog   | 1.66 |
| BC004037  | Ung           | uracil DNA glycosylase                                | 1.66 |
| BC027435  | Zwilch        | Zwilch, kinetochore associated, homolog               | 1.66 |
| BC003261  | Aurkb         | aurora kinase B                                       | 1.65 |
| NM_011799 | Cdc6          | cell division cycle 6 homolog                         | 1.65 |
| BM230253  | Cenpn         | centromere protein N                                  | 1.65 |
| AK013312  | Ccnb2         | cyclin B2                                             | 1.64 |
| BC005475  | Prc1          | protein regulator of cytokinesis 1                    | 1.63 |
| BM208103  | Ckap2         | cytoskeleton associated protein 2                     | 1.62 |
| BC004702  | Birc5         | baculoviral IAP repeat-containing 5                   | 1.61 |
| AF002823  | Bub1          | budding uninhibited by benzimidazoles 1 homolog       | 1.61 |
| C85740    | Chek1         | checkpoint kinase 1 homolog                           | 1.61 |
| AK021126  | Mtap7d2       | MAP7 domain containing 2                              | 1.61 |
| AK002962  | A030009H04Rik | RIKEN cDNA A030009H04 gene                            | 1.61 |
| BB787809  | Tacc3         | transforming, acidic coiled-coil containing protein 3 | 1.61 |
| NM_009791 | Aspm          | asp (abnormal spindle)-like, microcephaly associated  | 1.6  |
| NM_012025 | Racgap1       | Rac GTPase-activating protein 1                       | 1.59 |
| BB702347  | Ncapg         | non-SMC condensin I complex, subunit G                | 1.58 |
| AU045529  | Bub1b         | budding uninhibited by benzimidazoles 1 homolog, beta | 1.57 |
| BI690018  | Anln          | anillin, actin binding protein                        | 1.56 |
| BM234447  | Kif11         | kinesin family member 11                              | 1.56 |
| BB200034  | Kif20b        | kinesin family member 20B                             | 1.56 |
| BC003427  | Kif22         | kinesin family member 22                              | 1.56 |
| AW488914  | Gins2         | GIN5 complex subunit 2 (Psf2 homolog)                 | 1.55 |
| BC010581  | Stmn1         | stathmin 1                                            | 1.55 |
| AV316937  | Sgol2         | shugoshin-like 2 (S. pombe)                           | 1.55 |

|           |               |                                                                                          |      |
|-----------|---------------|------------------------------------------------------------------------------------------|------|
| U80932    | Aurka         | aurora kinase A                                                                          | 1.54 |
| BI081061  | Cdca3         | cell division cycle associated 3                                                         | 1.54 |
| BB770972  | Gas2l3        | growth arrest-specific 2 like 3                                                          | 1.54 |
| BF453953  | 2610036L11Rik | RIKEN cDNA 2610036L11 gene                                                               | 1.54 |
| NM_011325 | Scnn1b        | sodium channel, nonvoltage-gated 1 beta                                                  | 1.54 |
| X75483    | Ccna2         | cyclin A2                                                                                | 1.53 |
| AI385771  | Plk4          | polo-like kinase 4 (Drosophila)                                                          | 1.53 |
| NM_011234 | Rad51         | RAD51 homolog (S. cerevisiae)                                                            | 1.53 |
| AK004655  | Cep55         | centrosomal protein 55                                                                   | 1.52 |
| NM_008567 | Mcm6          | minichromosome maintenance deficient 6                                                   | 1.52 |
| BB426248  | 1500015O10Rik | RIKEN cDNA 1500015O10 gene                                                               | 1.52 |
| AV216351  | Siva1         | SIVA1, apoptosis-inducing factor                                                         | 1.52 |
| AI891882  | Cenpq         | centromere protein Q                                                                     | 1.51 |
| NM_033075 | D17H6S56E-5   | DNA segment, Chr 17, human D6S56E 5                                                      | 1.51 |
| C77054    | Nek2          | NIMA-related expressed kinase 2                                                          | 1.51 |
| NM_009387 | Tk1           | thymidine kinase 1                                                                       | 1.51 |
| BB706206  | Ywhaz         | tyrosine 3-monooxygenase/tryptophan 5-monooxygenase activation protein, zeta polypeptide | 1.51 |
| BM206009  | Atad2         | ATPase family, AAA domain containing 2                                                   | 1.5  |
| BB751158  | Mov10         | Moloney leukemia virus 10                                                                | 1.5  |
| AF069051  | Pttg1         | pituitary tumor-transforming gene 1                                                      | 1.5  |
| BI647893  | Slfn9         | schlafen 9                                                                               | 1.5  |
| NM_007659 | Cdc2a         | cell division cycle 2 homolog A                                                          | 1.49 |
| AY055122  | Otoa          | otoancorin                                                                               | 1.49 |
| AV307110  | Cdca8         | cell division cycle associated 8                                                         | 1.48 |
| NM_011132 | Pole          | polymerase (DNA directed), epsilon                                                       | 1.48 |
| NM_023223 | Cdc20         | cell division cycle 20 homolog                                                           | 1.46 |
| NM_008922 | Prim2         | DNA primase, p58 subunit                                                                 | 1.46 |
| BB821996  | 4930579G24Rik | RIKEN cDNA 4930579G24 gene                                                               | 1.46 |
| AK010336  | Trip13        | thyroid hormone receptor interactor 13                                                   | 1.46 |
| AV162459  | Ube2c         | ubiquitin-conjugating enzyme E2C                                                         | 1.46 |
| AF477481  | Cdt1          | chromatin licensing and DNA replication factor 1                                         | 1.45 |
| AV259620  | Skp2          | S-phase kinase-associated protein 2 (p45)                                                | 1.45 |
| NM_025863 | Trim59        | tripartite motif-containing 59                                                           | 1.45 |
| X82786    | Mki67         | antigen identified by monoclonal antibody Ki 67                                          | 1.44 |

|           |               |                                                         |      |
|-----------|---------------|---------------------------------------------------------|------|
| BC003428  | Asf1b         | ASF1 anti-silencing function 1 homolog B                | 1.44 |
| BC004801  | Idi1          | isopentenyl-diphosphate delta isomerase                 | 1.44 |
| NM_133762 | Ncapg2        | non-SMC condensin II complex, subunit G2                | 1.44 |
| BG066984  | Slc38a5       | solute carrier family 38, member 5                      | 1.44 |
| AK010400  | Bex4          | brain expressed gene 4                                  | 1.43 |
| NM_021891 | Figl1         | fidgetin-like 1                                         | 1.42 |
| BB829749  | Gm266         | gene model 266                                          | 1.42 |
| NM_008234 | Hells         | helicase, lymphoid specific                             | 1.41 |
| NM_010715 | Lig1          | ligase I, DNA, ATP-dependent                            | 1.4  |
| AV301324  | Rrm2          | ribonucleotide reductase M2                             | 1.4  |
| BC024598  | Stxbp6        | syntaxin binding protein 6 (amisyn)                     | 1.4  |
| BM942465  | Dnajc9        | DnaJ (Hsp40) homolog, subfamily C, member 9             | 1.39 |
| C80350    | Mcm3          | minichromosome maintenance deficient 3                  | 1.39 |
| BI665568  | Smc4          | structural maintenance of chromosomes 4                 | 1.39 |
| NM_025415 | Cks2          | CDC28 protein kinase regulatory subunit 2               | 1.38 |
| AV132173  | Cenpa         | centromere protein A                                    | 1.38 |
| AK014587  | Stard4        | StAR-related lipid transfer (START) domain containing 4 | 1.38 |
| BB431627  | Atad5         | ATPase family, AAA domain containing 5                  | 1.37 |
| AK011530  | Rpa2          | replication protein A2                                  | 1.37 |
| AA198774  | Alg14         | asparagine-linked glycosylation 14 homolog              | 1.36 |
| AU015121  | Ccnb1         | cyclin B1                                               | 1.36 |
| NM_008566 | Mcm5          | minichromosome maintenance deficient 5                  | 1.36 |
| NM_008892 | Pola1         | polymerase (DNA directed), alpha 1                      | 1.36 |
| BC010581  | Stmn1         | stathmin 1                                              | 1.36 |
| AW553784  | Eif2c2        | eukaryotic translation initiation factor 2C, 2          | 1.35 |
| NM_138685 | Wfdc15b       | WAP four-disulfide core domain 15B                      | 1.35 |
| NM_016904 | Cks1b         | CDC28 protein kinase 1b                                 | 1.33 |
| BB830191  | Itgb3bp       | integrin beta 3 binding protein                         | 1.33 |
| NM_007999 | Fen1          | flap structure specific endonuclease 1                  | 1.32 |
| AV158882  | Nqo1          | NAD(P)H dehydrogenase, quinone 1                        | 1.32 |
| J04620    | Prim1         | DNA primase, p49 subunit                                | 1.31 |
| AW045976  | 2310061C15Rik | RIKEN cDNA 2310061C15 gene                              | 1.31 |
| BB447978  | Mcm4          | minichromosome maintenance deficient 4                  | 1.3  |
| NM_008568 | Mcm7          | minichromosome maintenance deficient 7                  | 1.3  |
| NM_031374 | Tex15         | testis expressed gene 15                                | 1.29 |

1 Supplemental Table 2: Genes decreased upon ICI treatment

2

| Accession | Gene Symbol   | Gene Title                                                   | fold change |
|-----------|---------------|--------------------------------------------------------------|-------------|
| NM_009475 | Prap1         | proline-rich acidic protein 1                                | -49.28      |
| NM_017474 | Clca3         | chloride channel calcium activated 3                         | -20.63      |
| BC021880  | Abp1          | amiloride binding protein 1                                  | -8.96       |
| NM_007482 | Arg1          | arginase, liver                                              | -4.91       |
| NM_010373 | Gzme          | granzyme E                                                   | -4.33       |
| X14607    | Lcn2          | lipocalin 2                                                  | -4.19       |
| NM_008522 | Lf            | Lactoferrin                                                  | -3.1        |
| NM_010374 | Gzmf          | granzyme F                                                   | -2.52       |
| U25103    | Igkv15-103    | immunoglobulin kappa chain variable 15-103                   | -2.44       |
| BC017646  | Calb2         | calbindin 2                                                  | -2.38       |
| NM_009245 | Serpina1c     | serine (or cysteine) peptidase inhibitor, clade A, member 1C | -2.11       |
| NM_011059 | Padi1         | peptidyl arginine deiminase, type I                          | -2          |
| NM_053134 | Pcdhb9        | protocadherin beta 9                                         | -2          |
| BB009037  | Cp            | Ceruloplasmin                                                | -1.92       |
| BG064490  | AA881470      | EST AA881470                                                 | -1.89       |
| NM_007686 | Cfi           | complement component factor i                                | -1.73       |
| NM_008426 | Kcnj3         | potassium inwardly-rectifying channel, subfamily J, member 3 | -1.67       |
| BB391874  | A630033E08Rik | RIKEN cDNA A630033E08 gene                                   | -1.66       |
| BE862546  | Tacc1         | transforming, acidic coiled-coil containing protein 1        | -1.66       |
| BB253137  | Inhbb         | inhibin beta-B                                               | -1.64       |
| AI606154  | 5730409N24Rik | RIKEN cDNA 5730409N24 gene                                   | -1.62       |
| AF146523  | Malat1        | metastasis associated lung adenocarcinoma transcript 1       | -1.61       |
| BB041915  | Nrip1         | nuclear receptor interacting protein 1                       | -1.6        |
| BB534670  | Cd36          | CD36 antigen                                                 | -1.57       |
| L34570    | Alox15        | arachidonate 15-lipoxygenase                                 | -1.56       |
| BM246687  | 4930523C07Rik | RIKEN cDNA 4930523C07 gene                                   | -1.49       |
| BM244995  | Tlk1          | tousled-like kinase 1                                        | -1.47       |
| AK020162  | 6720477C19Rik | RIKEN cDNA 6720477C19 gene                                   | -1.43       |
| BG068076  | Wipi1         | WD repeat domain, phosphoinositide interacting 1             | -1.42       |

|           |               |                                                                 |       |
|-----------|---------------|-----------------------------------------------------------------|-------|
| AV256368  | Pfkfb2        | 6-phosphofructo-2-kinase/fructose-2,6-biphosphatase 2           | -1.4  |
| BQ033138  | Oasl2         | 2'-5' oligoadenylate synthetase-like 2                          | -1.4  |
| AK018053  | 5830474E16Rik | RIKEN cDNA 5830474E16 gene                                      | -1.39 |
| NM_009724 | Atp4b         | ATPase, H+/K+ exchanging, beta polypeptide                      | -1.38 |
| BB667439  | Phf21a        | PHD finger protein 21A (Phf21a), transcript variant 1, mRNA     | -1.37 |
| BE951033  | Tlcd1         | TLC domain containing 1                                         | -1.37 |
| BM241296  | 5330406M23Rik | RIKEN cDNA 5330406M23 gene                                      | -1.34 |
| BC005613  | Lpp           | LIM domain containing preferred translocation partner in lipoma | -1.32 |
| BC026387  | Eppk1         | epiplakin 1                                                     | -1.31 |
| NM_007913 | Egr1          | early growth response 1                                         | -1.3  |
| AF237627  | Lmod1         | leiomodrin 1 (smooth muscle)                                    | -1.29 |
| BB150886  | Dst           | Dystonin                                                        | -1.28 |
| AA023906  | Cux1          | cut-like homeobox 1                                             | -1.26 |

1  
2  
3  
4

1 Supplemental Table 3: Pathways differentially regulated by ICI treatment

2

| Pathways                                              | Molecules                                           | p-value  |
|-------------------------------------------------------|-----------------------------------------------------|----------|
| Mitotic Roles of Polo-Like Kinase                     | KIF11, CCNB2, PRC1, CDC20, CCNB1, CDC2, PTTG1, PLK4 | 5.75E-08 |
| Cell Cycle: G2/M DNA Damage Checkpoint Regulation     | YWHAZ, CCNB2, SKP2, CCNB1, CHEK1, CDC2, BRCA1       | 1.00E-07 |
| ATM Signaling                                         | RAD51, CCNB2, CCNB1, CHEK1, CDC2, BRCA1, TLK1       | 6.92E-07 |
| Role of CHK Proteins in Cell Cycle Checkpoint Control | CHEK1, CDC2, BRCA1, E2F2, TLK1                      | 1.78E-05 |
| Role of BRCA1 in DNA Damage Response                  | RAD51, SMARCD2, CHEK1, BRCA1, E2F2                  | 1.38E-04 |
| Pyrimidine Metabolism                                 | RRM2, PRIM2, PRIM1, TK1, POLE, POLA1, UNG           | 3.72E-04 |
| Aryl Hydrocarbon Receptor Signaling                   | MCM7, CCNE2, CHEK1, POLA1, NQO1, CCNA2, NRIP1       | 4.47E-04 |
| Cell Cycle: G1/S Checkpoint Regulation                | SKP2, CCNE2, E2F2                                   | 1.86E-02 |
| Purine Metabolism                                     | RAD51, RRM2, PRIM2, PRIM1, KIF20B, POLE, POLA1      | 2.24E-02 |
| Biosynthesis of Steroids                              | IDI1, NQO1                                          | 2.75E-02 |
| Small Cell Lung Cancer Signaling                      | SKP2, CCNE2, CKS1B                                  | 3.09E-02 |
| Sonic Hedgehog Signaling                              | CCNB1, CDC2                                         | 3.16E-02 |
| Cell Cycle Regulation by BTG Family Proteins          | CCNE2, E2F2                                         | 4.57E-02 |
| p53 Signaling                                         | CHEK1, BIRC5, BRCA1                                 | 5.62E-02 |
| Nicotinate and Nicotinamide Metabolism                | NEK2, TTK, CDC2                                     | 6.46E-02 |
| Protein Ubiquitination Pathway                        | SKP2, UBE2C, CDC20, BRCA1                           | 6.92E-02 |
| Pancreatic Adenocarcinoma Signaling                   | RAD51, BIRC5, E2F2                                  | 8.13E-02 |

3

4

5

6

7
